# Supplementary material for: Diselenide–yne chemistry for selenium-containing linear polymer modification
Source: Royal Society of Chemistry journal article supplement (doi:10.1039/d2py00621a), 2022-01-01
Supplement: d2py00621a1.pdf [file d2py00621a1.pdf]

Electronic Supplementary Material (ESI) for Polymer Chemistry.  
This journal is © The Royal Society of Chemistry 2022

## Supporting Information

### Diselenide-yne chemistry for selenium-containing linear polymer modification

Ming Liu,<sup>a‡</sup> Sisi Chen,<sup>a‡</sup> Xiaofang Lin,<sup>a</sup> Hanliang He,<sup>\*a,b</sup> Jie Gao,<sup>c,d</sup> Yonghua Zhai,<sup>d</sup> Yan Wu,<sup>d</sup> Jian Zhu,<sup>a</sup> and Xiangqiang Pan<sup>\*a</sup>

#### Affiliations:

<sup>a</sup> State and Local Joint Engineering Laboratory for Novel Functional Polymeric Materials, Jiangsu Key Laboratory of Advanced Functional Polymer Design and Application, College of Chemistry, Chemical Engineering and Materials Science Soochow University, Suzhou, 215123, PR China. E-mail: [panxq@suda.edu.cn](mailto:panxq@suda.edu.cn)

<sup>b</sup> The Department of Orthopedic Surgery, Dushu Lake Hospital Affiliated to Soochow University, Suzhou, 215028, China.

<sup>c</sup> Changhai Clinical Research Unit, Shanghai Changhai Hospital, Naval Medical University, Shanghai 200433, China.

<sup>d</sup> Department of Biomaterial, College of Life Sciences, Mudanjiang Medical University, Mudanjiang 157011, China.

## 1. Experimental section

### 1.1 Characterization data for monomers

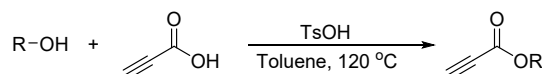

**Scheme S1.** Synthetic procedure of general monomers.

Characterization data for **2-(2-(2-methoxyethoxy)ethoxy)ethyl propiolate** (Figure S4-5). <sup>1</sup>H NMR (300 MHz, CDCl<sub>3</sub>), δ (ppm): 4.33 (t, *J* = 4.5 Hz, 2H), 3.72 (t, *J* = 4.5 Hz, 2H), 3.68-3.59 (m, 6H), 3.57-3.50 (m, 2H), 3.37 (s, 3H), 2.90 (s, 1H). <sup>13</sup>C NMR (75 MHz, CDCl<sub>3</sub>), δ (ppm): 152.61, 75.10, 74.53, 71.91, 70.68, 70.59, 68.55, 65.23, 59.03.

Characterization data for **hexyl propiolate** (Figure S6-7). <sup>1</sup>H NMR (300 MHz, CDCl<sub>3</sub>), δ (ppm): 4.18 (t, *J* = 7.5 Hz, 2H), 2.87 (s, 1H), 1.74-1.61 (m, 2H), 1.43-1.22 (m, 6H), 0.89 (t, *J* = 7.5 Hz, 3H). <sup>13</sup>C NMR (75 MHz, CDCl<sub>3</sub>), δ (ppm): 152.82, 74.80, 74.37, 66.48, 31.32, 28.27, 25.41, 22.48, 13.95.

Characterization data for **benzyl propiolate** (Figure S8-9). <sup>1</sup>H NMR (300 MHz, CDCl<sub>3</sub>), δ (ppm): δ 7.43-7.30 (m, 5H), 5.23 (s, 2H), 2.89 (s, 1H). <sup>13</sup>C NMR (75 MHz, CDCl<sub>3</sub>), δ (ppm): 152.53, 134.52, 128.72, 128.69, 128.57, 75.06, 74.55, 67.92.

## 1.2 Characterization data for 6-((2-bromo-2-methylpropanoyl)oxy)hexyl propiolate

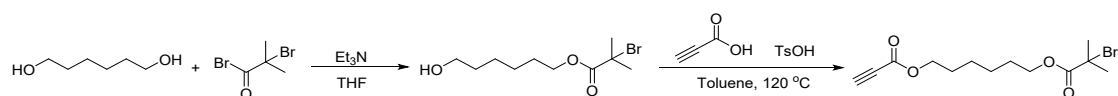

**Scheme S2.** Synthetic procedure of 6-((2-bromo-2-methylpropanoyl)oxy)hexyl propiolate.

Characterization data for **6-((2-bromo-2-methylpropanoyl)oxy)hexyl propiolate** (Figure S10-11).  $^1\text{H}$  NMR (300 MHz,  $\text{CDCl}_3$ ),  $\delta$  (ppm):  $\delta$  4.18 (q,  $J = 6.0$  Hz, 4H), 2.88 (s, 1H), 1.92 (s, 6H), 1.76-1.62 (m, 4H), 1.49-1.35 (m, 4H).  $^{13}\text{C}$  NMR (75 MHz,  $\text{CDCl}_3$ ),  $\delta$  (ppm): 171.69, 152.76, 74.73, 74.55, 66.18, 65.84, 55.92, 30.76, 28.20, 25.44, 25.40.

## 2. Results and Discussion

**Table S1** Screening of reaction conditions for selenium-containing brush polymers through SET-LRP. <sup>a</sup>

| Entry | $[\text{MMA}]_0 : [\text{EGIn}]_0 : [\text{Me}_6\text{TREN}]_0 : [\text{CuBr}_2]_0$ | $M_{n,\text{SEC}}^b (\text{g mol}^{-1})$ | $\mathcal{D}^b$ |
|-------|-------------------------------------------------------------------------------------|------------------------------------------|-----------------|
| 1     | 50 : 1 : 0.2 : 0.1                                                                  | 20400                                    | 1.74            |
| 2     | 50 : 1 : 0.2 : 0.2                                                                  | 12300                                    | 1.56            |
| 3     | 50 : 1 : 0.2 : 0.3                                                                  | 9100                                     | 2.40            |

<sup>a</sup> Reaction conditions :  $[\text{MMA}]_0 = 8.33$  M, polymerized in DMSO at 25 °C using  $l = 1.4$  cm,  $d = 0.5$  mm Cu(0)-wire, 4 h. <sup>b</sup> Determined by SEC using polystyrene (PS) as the standard in THF.

**Table S2** Grafting of functional monomers through SET-LRP using EGIn as the macroinitiator. <sup>a</sup>

| Entry | Monomer | Time (h) | $M_{n,\text{SEC}} (\text{g mol}^{-1})$ | $\mathcal{D}^b$ |
|-------|---------|----------|----------------------------------------|-----------------|
| 1     | TEGMA   | 4        | 9600                                   | 1.77            |
| 2     | DMAEMA  | 3        | 8700                                   | 1.76            |
| 3     | DMAEMA  | 4        | 13400                                  | 1.92            |
| 4     | DMAEMA  | 6        | 19100                                  | 1.85            |

<sup>a</sup> Reaction conditions:  $[\text{M}]_0 = 8.33$  M, polymerized in DMSO at 25 °C using  $l = 1.4$  cm,  $d = 0.5$  mm Cu(0)-wire,  $[\text{M}]_0 : [\text{EGIn}]_0 : [\text{Me}_6\text{TREN}]_0 : [\text{CuBr}_2]_0 = 50 : 1 : 0.2 : 0.2$ . <sup>b</sup> Determined by SEC using polystyrene (PS) as the standard in THF.

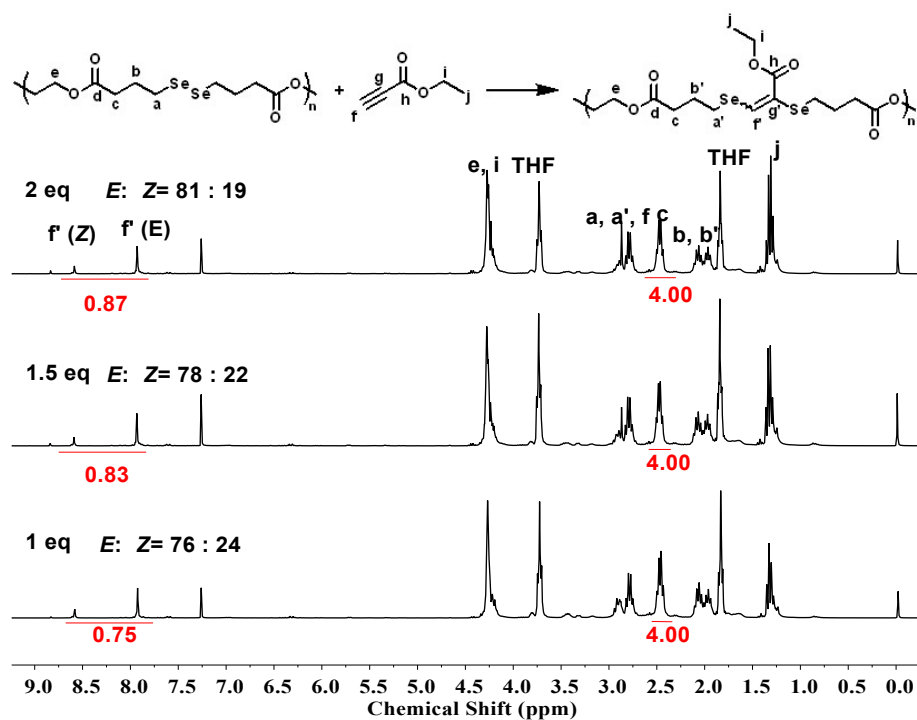

**Figure S1.** <sup>1</sup>H NMR spectra of the reaction mixture of EGSe<sub>2</sub> and ethyl propiolate (Table 1, entries 1-3) in CDCl<sub>3</sub>. Set the integral of c to 4.00, then the degree of functionalization was calculated by the formula (Integral of f)/1.00\*100%.

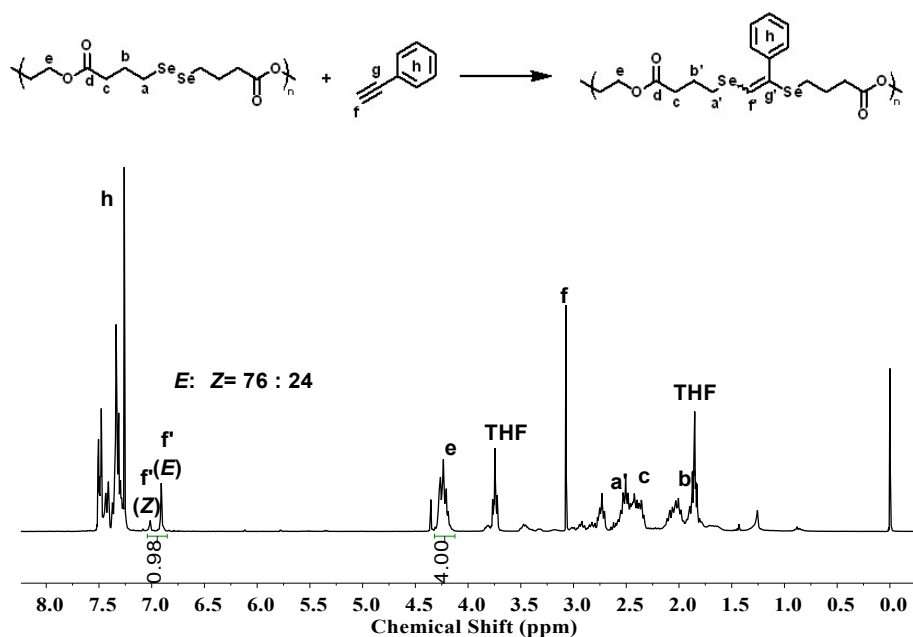

**Figure S2.** <sup>1</sup>H NMR spectrum of the reaction mixture of EGSe<sub>2</sub> and phenylacetylene (Table 1, entry 4) in CDCl<sub>3</sub>. Set the integral of e to 4.00, then the degree of functionalization was calculated by the formula (Integral of f)/1.00\*100%.

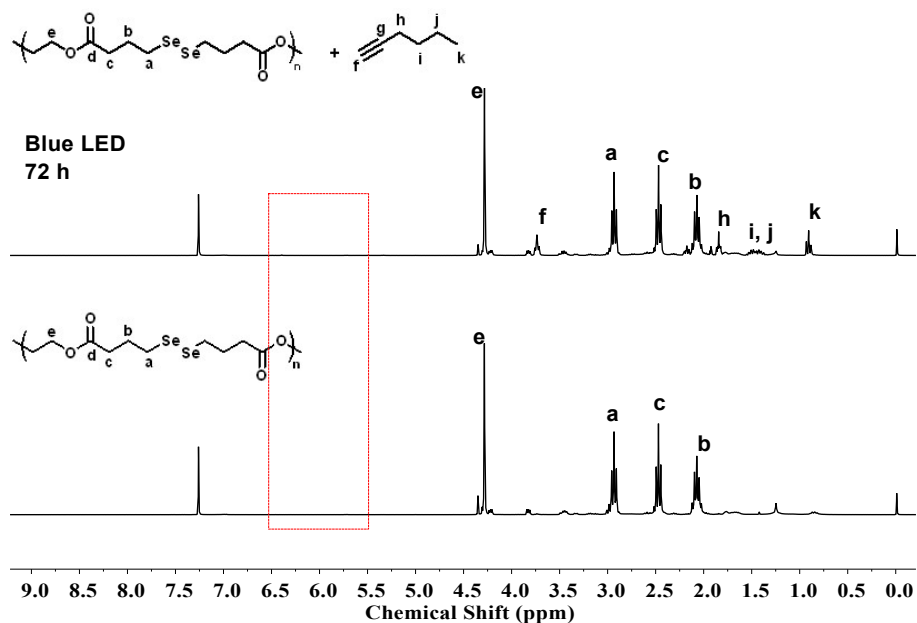

**Figure S3.**  $^1\text{H}$  NMR spectra of EGSe<sub>2</sub> and the reaction mixture of EGSe<sub>2</sub> and 1-hexyne (Table 1, entry 5) in CDCl<sub>3</sub>. As shown in the spectra, the signal peak of the double bond was not observed at 6.5-5.5 ppm, thus the reaction did not happen even in 72 hours under the Blue LED irradiation.

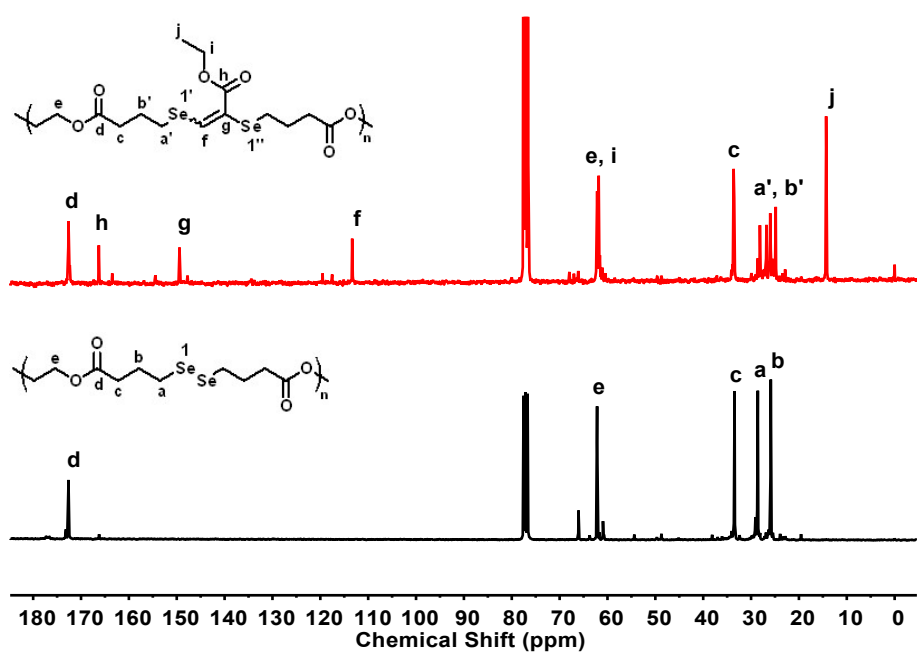

**Figure S4.**  $^{13}\text{C}$  NMR spectra of EGSe<sub>2</sub> and EGSe<sub>2</sub>-Et in CDCl<sub>3</sub>.

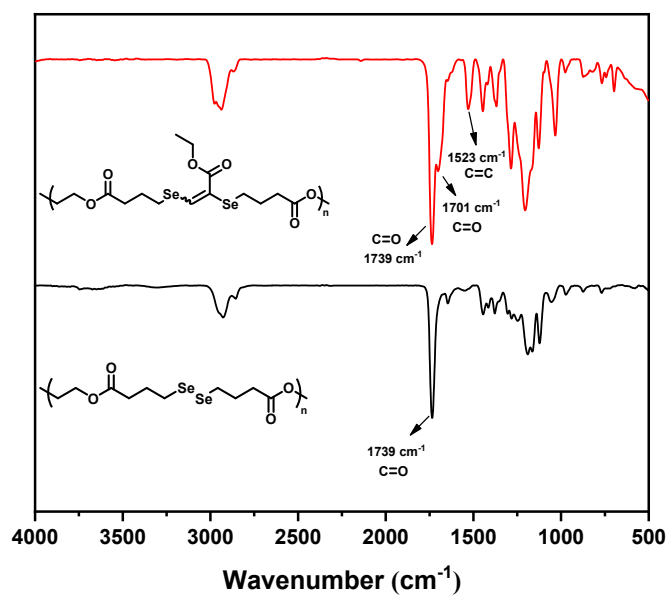

Figure S5. FT-IR spectra of EGSe<sub>2</sub> and EGSe<sub>2</sub>-Et.

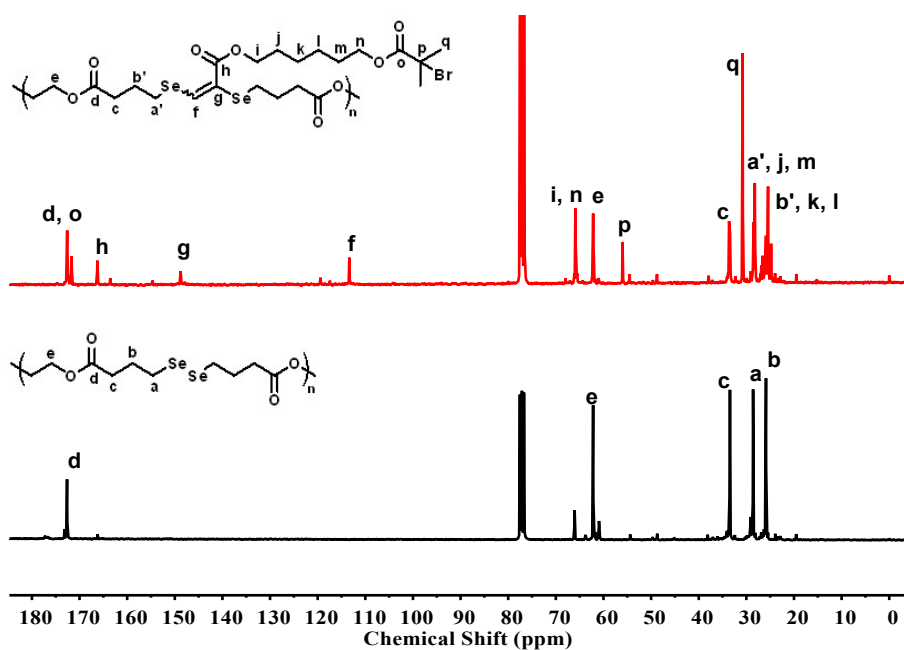

Figure S6. <sup>13</sup>C NMR spectra of EGSe<sub>2</sub> and EGIn in CDCl<sub>3</sub>.

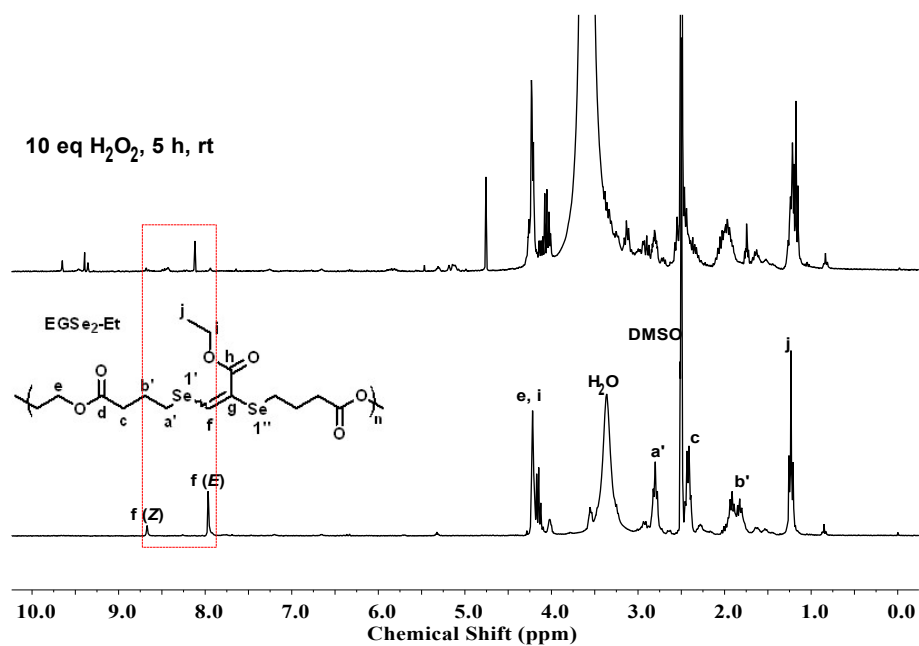

**Figure S7.** <sup>1</sup>H NMR spectra of EGSe<sub>2</sub>-Et before and after oxidization with 10 eq H<sub>2</sub>O<sub>2</sub> in DMSO-*d*<sub>6</sub>. EGSe<sub>2</sub>-Et (9.2 mg) dissolved in DMSO-*d*<sub>6</sub> (1 mL) was mixed with 30% H<sub>2</sub>O<sub>2</sub> (20 μL) at room temperature. After incubation for 5 h, the solution was evaluated by <sup>1</sup>H NMR.

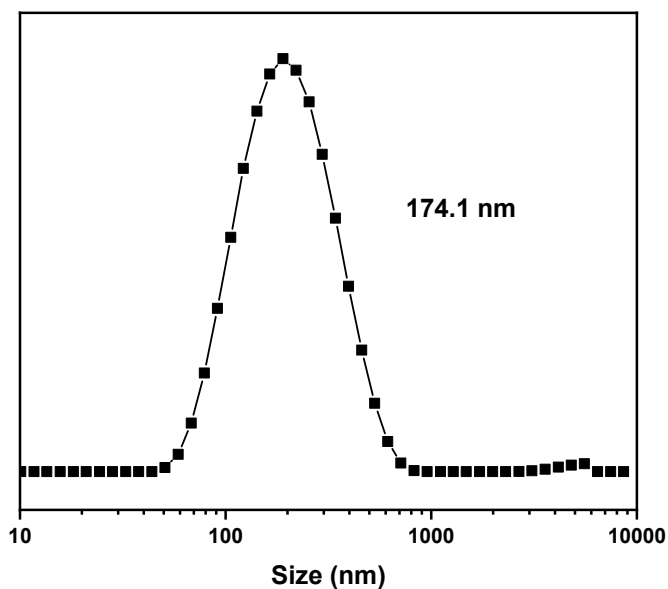

**Fig S8.** Particle size of polyplexes at a polymer/pDNA weight ratio = 3. Sample: EGIIn-*g*-PDMAEMA,  $M_n = 8700 \text{ g mol}^{-1}$ ,  $\mathcal{D} = 1.76$ .

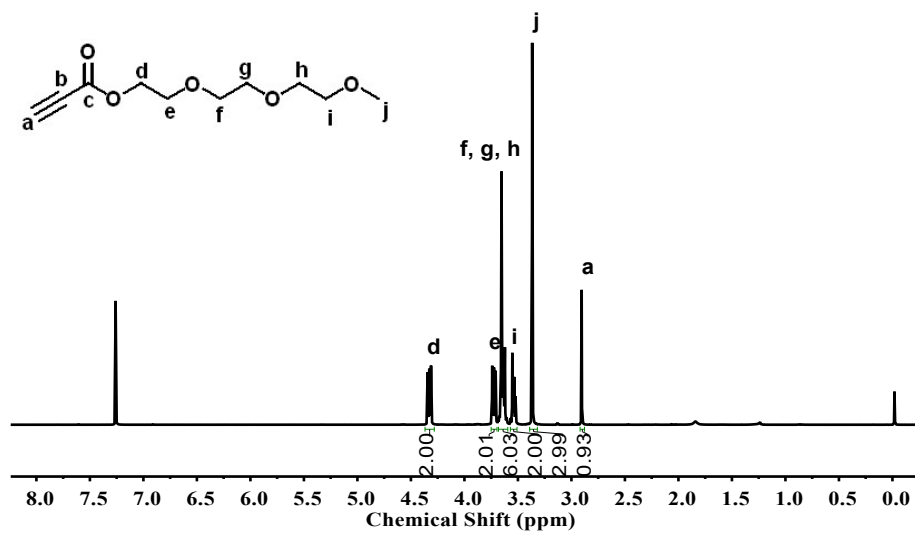

Figure S9.  $^1\text{H}$  NMR spectrum of 2-(2-(2-methoxyethoxy)ethoxy)ethyl propiolate in  $\text{CDCl}_3$ .

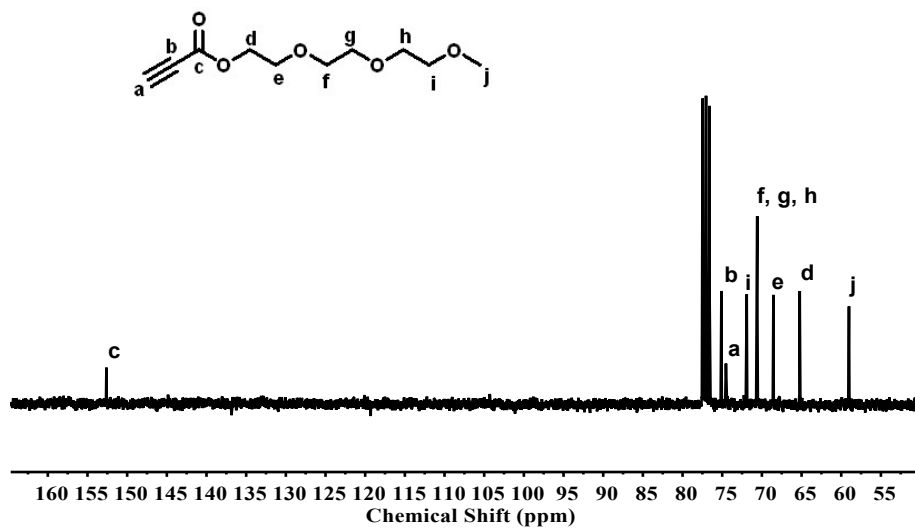

Figure S10.  $^{13}\text{C}$  NMR spectrum of 2-(2-(2-methoxyethoxy)ethoxy)ethyl propiolate in  $\text{CDCl}_3$ .

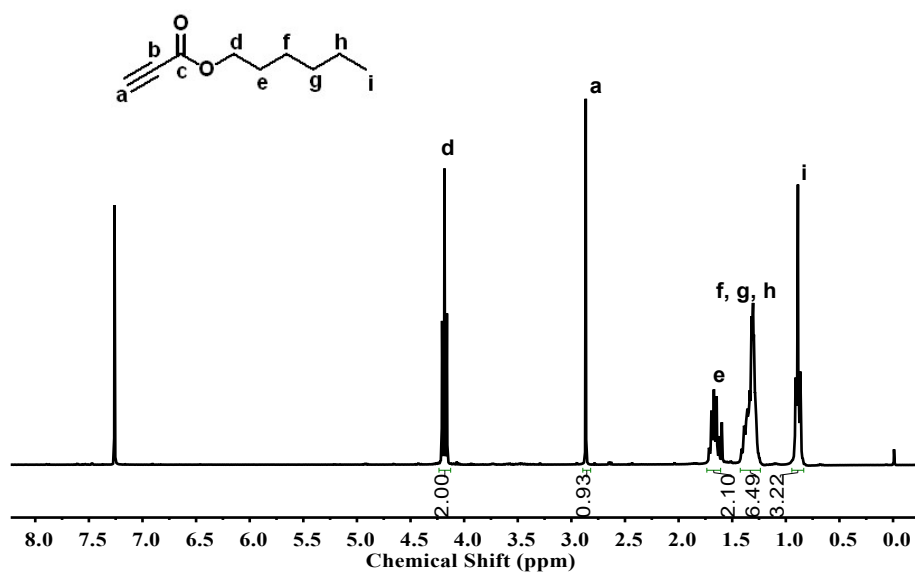

Figure S11. <sup>1</sup>H NMR spectrum of hexyl propiolate in CDCl<sub>3</sub>.

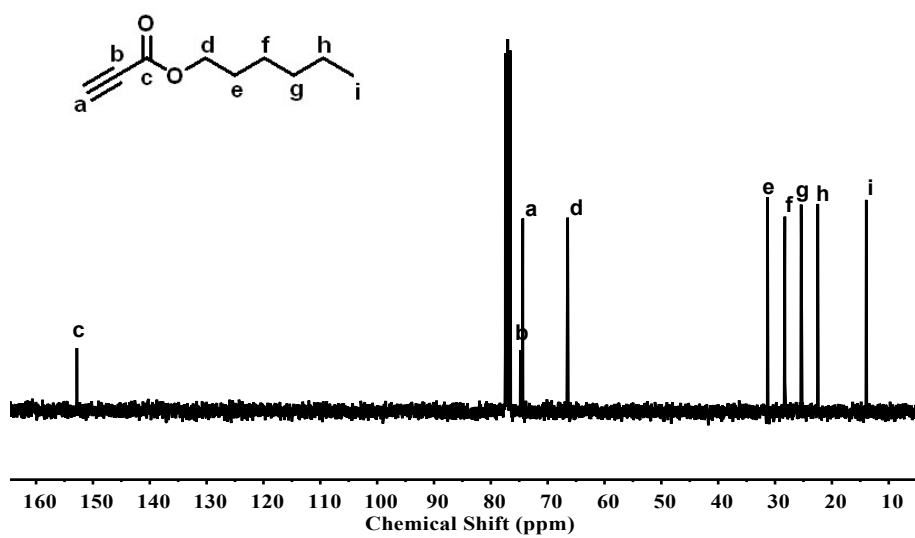

Figure S12. <sup>13</sup>C NMR spectrum of hexyl propiolate in CDCl<sub>3</sub>.



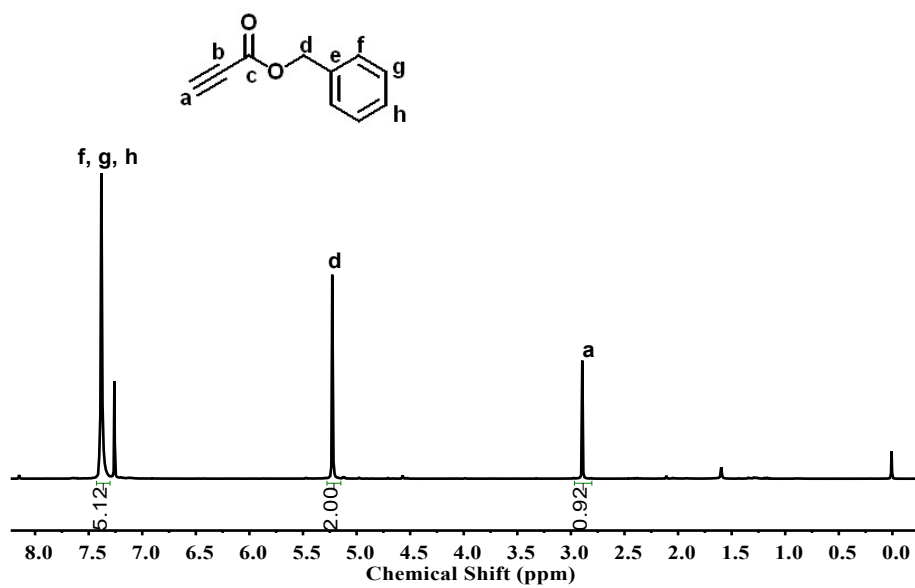

**Figure S13.**  $^1\text{H}$  NMR spectrum of benzyl propiolate in  $\text{CDCl}_3$ .

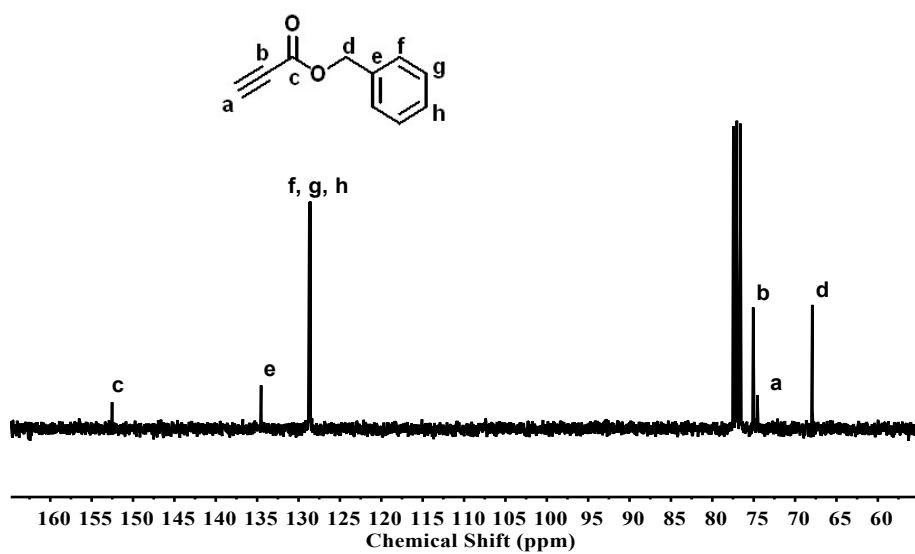

**Figure S14.**  $^{13}\text{C}$  NMR spectrum of benzyl propiolate in  $\text{CDCl}_3$ .

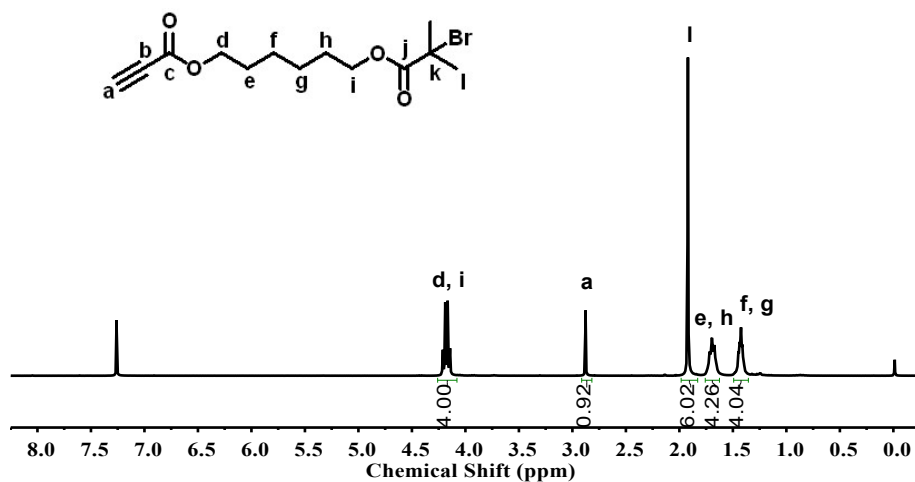

Figure S15. <sup>1</sup>H NMR spectrum of 6-((2-bromo-2-methylpropanoyl)oxy)hexyl propiolate in CDCl<sub>3</sub>.

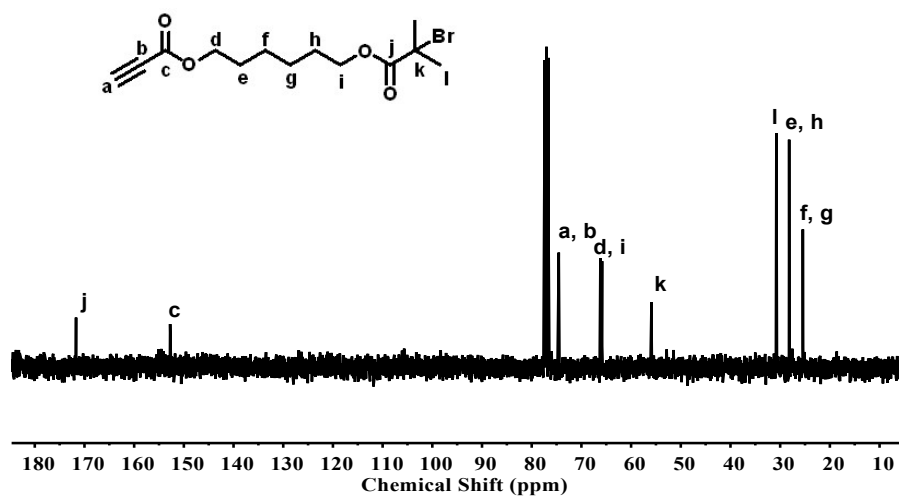

Figure S16. <sup>13</sup>C NMR spectrum of 6-((2-bromo-2-methylpropanoyl)oxy)hexyl propiolate in CDCl<sub>3</sub>.
